# Supplementary material for: Changes in total plasma and serum N-glycome composition and patient-controlled analgesia after major abdominal surgery
Source: PubMed Central journal article supplement (PMC4977520; doi:10.1038/srep31234), 2016-08-09

## Supplementary information file

### Changes in total plasma and serum N-glycome composition and patient-controlled analgesia after major abdominal surgery

Ivan Gudelj, Marco Baciarello, Ivo Ugrina, Manuela De Gregori, Valerio Napolioni, Pablo M Ingelmo, Dario Bugada, Simona De Gregori, Lovorka Đerek, Maja Pučić-Baković, Mislav Novokmet, Olga Gornik, Gloria Sacconi Jotti, Tiziana Meschi, Gordan Lauc and Massimo Allegri

**Supplementary Table S1. Composition of the plasma N-glycome.** Plasma N-glycome was separated into 39 chromatographic peaks by HILIC-UPLC.

| <b>Glycan peak</b> | <b>Major structure *</b> | <b>glycan</b> | <b>General description</b>                                            |
|--------------------|--------------------------|---------------|-----------------------------------------------------------------------|
| GP1                | FA2                      |               | Agalactosylated                                                       |
| GP2                | M5, FA2B                 |               | high mannose (M5), agalactosylated with bisecting GlcNAc (FA2B)       |
| GP3                | A2[6]BG1                 |               | monogalactosylated with bisecting GlcNAc                              |
| GP4                | FA2[6]G1                 |               | monogalactosylated with core fucose                                   |
| GP5                | FA2[3]G1                 |               | monogalactosylated with core fucose                                   |
| GP6                | FA2[6]BG1                |               | monogalactosylated with core fucose and bisecting GlcNAc              |
| GP7                | M6                       |               | high mannose                                                          |
| GP8                | A2G2                     |               | Digalactosylated                                                      |
| GP9                | A2BG2                    |               | digalactosylated with bisecting GlcNAc                                |
| GP10               | FA2G2                    |               | digalactosylated with core fucose                                     |
| GP11               | FA2BG2                   |               | digalactosylated with core fucose and bisecting GlcNAc                |
| GP12               | A2[3]BG1S1               |               | monogalactosylated with bisecting GlcNAc                              |
| GP13               | FA2[3]G1S1               |               | monogalactosylated and sialylated with core fucose                    |
| GP14               | A2G2S1                   |               | digalactosylated and sialylated                                       |
| GP15               | A2BG2S1                  |               | digalactosylated and sialylated with bisecting GlcNAc                 |
| GP16               | FA2G2S1                  |               | digalactosylated and sialylated with core fucose                      |
| GP17               | FA2BG2S1                 |               | digalactosylated and sialylated with bisecting GlcNAc and core fucose |
| GP18               | A2G2S2                   |               | digalactosylated and sialylated                                       |
| GP19               | M9                       |               | high mannose                                                          |
| GP20               | A2G2S2                   |               | digalactosylated and sialylated                                       |
| GP21               | A2BG2S2                  |               | digalactosylated and sialylated with bisecting GlcNAc                 |
| GP22               | FA2G2S2                  |               | digalactosylated and sialylated with core fucose                      |
| GP23               | FA2BG2S2                 |               | digalactosylated and sialylated with bisecting GlcNAc and core fucose |
| GP24               | A3G3S2                   |               | trigalactosylated and sialylated                                      |
| GP25               | A3BG3S2                  |               | trigalactosylated and sialylated with bisecting GlcNAc                |
| GP26               | A3G3S2                   |               | trigalactosylated and sialylated                                      |
| GP27               | A3G3S3                   |               | trigalactosylated and sialylated                                      |
| GP28               | A3G3S3                   |               | trigalactosylated and sialylated                                      |
| GP29               | FA3G3S3                  |               | trigalactosylated and sialylated with core fucose                     |

|      |          |                                                          |
|------|----------|----------------------------------------------------------|
| GP30 | A3G3S3   | trigalactosylated and sialylated                         |
| GP31 | FA3G3S3  | trigalactosylated and sialylated with core fucose        |
| GP32 | A3F1G3S3 | trigalactosylated and sialylated with antennary fucose   |
| GP33 | A4G4S3   | tetragalactosylated and sialylated                       |
| GP34 | A4G4S3   | tetragalactosylated and sialylated                       |
| GP35 | A4F1G3S3 | tetragalactosylated and sialylated with antennary fucose |
| GP36 | A4G4S4   | tetragalactosylated and sialylated                       |
| GP37 | A4G4S4   | tetragalactosylated and sialylated                       |
| GP38 | A4G4S4   | tetragalactosylated and sialylated                       |
| GP39 | A4F1G4S4 | tetragalactosylated and sialylated with antennary fucose |

\* according to Saldova et al., JPR, 2014.

**Supplementary Table S2: Slope estimates and inference measures (SE-standard error, adjusted p values) on the discovery cohort from linear mixed effects models between intraoperative time point and 6, 12, 24 and 48 hours after surgery. Statistically non-significant results (0.05 level) are marked with “-“.**

| glycan | After 6 hours |       |       | After 12 hours |       |        | After 24 hours |       |        | After 48 hours |       |        |
|--------|---------------|-------|-------|----------------|-------|--------|----------------|-------|--------|----------------|-------|--------|
|        | slope         | se    | p     | slope          | se    | p      | slope          | se    | p      | slope          | se    | p      |
| GP1    | -             | -     | -     | -              | -     | -      | -              | -     | -      | -0.013         | 0.001 | <0.001 |
| GP2    | 0.046         | 0.014 | 0.024 | -              | -     | -      | -0.014         | 0.003 | <0.001 | -0.017         | 0.002 | <0.001 |
| GP3    | 0.04          | 0.012 | 0.02  | -              | -     | -      | -0.017         | 0.003 | <0.001 | -0.017         | 0.001 | <0.001 |
| GP4    | -             | -     | -     | -              | -     | -      | -0.015         | 0.003 | <0.001 | -0.019         | 0.001 | <0.001 |
| GP5    | -             | -     | -     | -              | -     | -      | -0.016         | 0.003 | <0.001 | -0.019         | 0.001 | <0.001 |
| GP6    | 0.032         | 0.011 | 0.048 | -              | -     | -      | -0.014         | 0.002 | <0.001 | -0.017         | 0.001 | <0.001 |
| GP7    | -             | -     | -     | -              | -     | -      | -0.015         | 0.003 | <0.001 | -0.016         | 0.002 | <0.001 |
| GP8    | -             | -     | -     | -              | -     | -      | -              | -     | -      | -              | -     | -      |
| GP9    | -             | -     | -     | -              | -     | -      | -              | -     | -      | -0.011         | 0.002 | <0.001 |
| GP10   | -             | -     | -     | -              | -     | -      | -0.014         | 0.002 | <0.001 | -0.017         | 0.001 | <0.001 |
| GP11   | -             | -     | -     | -              | -     | -      | -0.018         | 0.002 | <0.001 | -0.016         | 0.001 | <0.001 |
| GP12   | -             | -     | -     | -              | -     | -      | -              | -     | -      | -0.008         | 0.001 | <0.001 |
| GP13   | -             | -     | -     | -              | -     | -      | -0.013         | 0.003 | <0.001 | -0.015         | 0.001 | <0.001 |
| GP14   | -             | -     | -     | -              | -     | -      | -              | -     | -      | 0.006          | 0.002 | 0.002  |
| GP15   | -             | -     | -     | -              | -     | -      | -              | -     | -      | -0.008         | 0.001 | <0.001 |
| GP16   | -             | -     | -     | -              | -     | -      | -0.017         | 0.002 | <0.001 | -0.017         | 0.001 | <0.001 |
| GP17   | -             | -     | -     | -              | -     | -      | -0.015         | 0.002 | <0.001 | -0.014         | 0.001 | <0.001 |
| GP18   | -             | -     | -     | -              | -     | -      | -              | -     | -      | -              | -     | -      |
| GP19   | -             | -     | -     | -              | -     | -      | -              | -     | -      | -0.009         | 0.002 | <0.001 |
| GP20   | -             | -     | -     | 0.024          | 0.006 | 0.001  | 0.031          | 0.002 | <0.001 | 0.021          | 0.001 | <0.001 |
| GP21   | -             | -     | -     | -              | -     | -      | -              | -     | -      | 0.012          | 0.001 | <0.001 |
| GP22   | -             | -     | -     | -              | -     | -      | -              | -     | -      | -              | -     | -      |
| GP23   | -             | -     | -     | -              | -     | -      | -0.013         | 0.002 | <0.001 | -0.014         | 0.001 | <0.001 |
| GP24   | -             | -     | -     | -0.021         | 0.005 | 0.001  | -0.011         | 0.002 | <0.001 | -0.009         | 0.001 | <0.001 |
| GP25   | -             | -     | -     | -              | -     | -      | 0.013          | 0.004 | 0.018  | 0.017          | 0.002 | <0.001 |
| GP26   | -0.032        | 0.011 | 0.045 | -0.029         | 0.006 | <0.001 | -              | -     | -      | -              | -     | -      |
| GP27   | -             | -     | -     | -0.021         | 0.005 | 0.001  | -              | -     | -      | 0.009          | 0.001 | <0.001 |
| GP28   | -             | -     | -     | -              | -     | -      | -0.007         | 0.002 | 0.033  | -0.011         | 0.001 | <0.001 |
| GP29   | -             | -     | -     | -              | -     | -      | 0.021          | 0.003 | <0.001 | 0.017          | 0.002 | <0.001 |
| GP30   | -             | -     | -     | -              | -     | -      | -              | -     | -      | -              | -     | -      |
| GP31   | -             | -     | -     | -              | -     | -      | -              | -     | -      | -              | -     | -      |
| GP32   | -             | -     | -     | -              | -     | -      | -              | -     | -      | 0.004          | 0.001 | 0.031  |
| GP33   | -             | -     | -     | -0.014         | 0.005 | 0.045  | -              | -     | -      | 0.007          | 0.001 | <0.001 |
| GP34   | -             | -     | -     | -0.022         | 0.007 | 0.018  | -              | -     | -      | -              | -     | -      |
| GP35   | -             | -     | -     | -              | -     | -      | -              | -     | -      | 0.006          | 0.001 | <0.001 |
| GP36   | -0.046        | 0.014 | 0.019 | -0.024         | 0.008 | 0.026  | 0.012          | 0.004 | 0.015  | 0.013          | 0.002 | <0.001 |
| GP37   | -0.041        | 0.014 | 0.046 | -              | -     | -      | 0.012          | 0.003 | 0.004  | 0.01           | 0.002 | <0.001 |
| GP38   | -0.05         | 0.015 | 0.023 | -              | -     | -      | 0.02           | 0.004 | <0.001 | 0.018          | 0.002 | <0.001 |
| GP39   | -0.04         | 0.014 | 0.049 | -              | -     | -      | 0.015          | 0.003 | <0.001 | 0.02           | 0.001 | <0.001 |

**Supplementary Table S3: Slope estimates and inference measures (SE-standard error, adjusted p values) on the replication cohort from linear mixed effects models between intraoperative time point and 24, 48 hours after surgery. Statistically non-significant results (0.05 level) are marked with “-“.**

| glycan  | After 24 hours |       |        | After 48 hours |       |        |
|---------|----------------|-------|--------|----------------|-------|--------|
|         | slope          | se    | P      | Slope          | se    | P      |
| GP1     | -              | -     | -      | -0.01          | 0.001 | <0.001 |
| GP2     | -0.011         | 0.002 | <0.001 | -0.017         | 0.001 | <0.001 |
| GP3     | 0.019          | 0.006 | 0.02   | -              | -     | -      |
| GP4     | -0.008         | 0.002 | 0.003  | -0.014         | 0.001 | <0.001 |
| GP5     | -              | -     | -      | -0.01          | 0.001 | <0.001 |
| GP6     | -0.011         | 0.003 | 0.001  | -0.018         | 0.001 | <0.001 |
| GP7     | -0.013         | 0.002 | <0.001 | -0.023         | 0.002 | <0.001 |
| GP8     | -              | -     | -      | -0.008         | 0.002 | <0.001 |
| GP9     | 0.015          | 0.005 | 0.044  | -0.009         | 0.003 | 0.01   |
| GP10    | -              | -     | -      | -0.012         | 0.001 | <0.001 |
| GP11    | -              | -     | -      | -0.013         | 0.002 | <0.001 |
| GP12.13 | -              | -     | -      | -0.021         | 0.002 | <0.001 |
| GP14    | -0.013         | 0.004 | 0.01   | -              | -     | -      |
| GP15    | -              | -     | -      | -              | -     | -      |
| GP16    | -              | -     | -      | -0.015         | 0.001 | <0.001 |
| GP17    | -              | -     | -      | -0.012         | 0.001 | <0.001 |
| GP18    | -0.01          | 0.001 | <0.001 | -0.006         | 0.001 | <0.001 |
| GP19    | -0.018         | 0.004 | <0.001 | -0.026         | 0.002 | <0.001 |
| GP20    | 0.021          | 0.004 | <0.001 | 0.027          | 0.002 | <0.001 |
| GP21    | -              | -     | -      | -              | -     | -      |
| GP22    | -              | -     | -      | -              | -     | -      |
| GP23    | -0.008         | 0.002 | 0.009  | -0.013         | 0.001 | <0.001 |
| GP24.25 | -0.01          | 0.002 | <0.001 | -0.01          | 0.001 | <0.001 |
| GP26    | -0.011         | 0.003 | 0.005  | -0.01          | 0.001 | <0.001 |
| GP27    | -              | -     | -      | 0.007          | 0.001 | <0.001 |
| GP28    | -0.012         | 0.002 | <0.001 | -0.013         | 0.001 | <0.001 |
| GP29    | 0.022          | 0.004 | <0.001 | 0.016          | 0.002 | <0.001 |
| GP30    | -              | -     | -      | -0.004         | 0.001 | <0.001 |
| GP31    | -              | -     | -      | -0.004         | 0.001 | 0.01   |
| GP32    | -              | -     | -      | 0.009          | 0.001 | <0.001 |
| GP33    | -              | -     | -      | 0.009          | 0.001 | <0.001 |
| GP34    | -              | -     | -      | 0.006          | 0.002 | 0.01   |
| GP35    | -              | -     | -      | 0.006          | 0.001 | <0.001 |
| GP36    | 0.022          | 0.003 | <0.001 | 0.019          | 0.002 | <0.001 |
| GP37    | 0.022          | 0.003 | <0.001 | 0.015          | 0.002 | <0.001 |
| GP38    | 0.036          | 0.003 | <0.001 | 0.026          | 0.002 | <0.001 |
| GP39    | 0.02           | 0.003 | <0.001 | 0.023          | 0.001 | <0.001 |

**Supplementary Table S4: Agreement between estimated slopes for the discovery and the replication cohorts. Same effect between cohorts is marked with green color while the opposite effect is marked with red color. Statistically non-significant results (0.05 level) are marked with “-“.**

| glycan | After 24 hours |             | After 48 hours |             |
|--------|----------------|-------------|----------------|-------------|
|        | Discovery      | Replication | Discovery      | Replication |
| GP1    | -              | -           | -0.013         | -0.01       |
| GP2    | -0.014         | -0.011      | -0.017         | -0.017      |
| GP3    | -0.017         | 0.019       | -0.017         | -           |
| GP4    | -0.015         | -0.008      | -0.019         | -0.014      |
| GP5    | -0.016         | -           | -0.019         | -0.01       |
| GP6    | -0.014         | -0.011      | -0.017         | -0.018      |
| GP7    | -0.015         | -0.013      | -0.016         | -0.023      |
| GP8    | -              | -           | -              | -0.008      |
| GP9    | -              | 0.015       | -0.011         | -0.009      |
| GP10   | -0.014         | -           | -0.017         | -0.012      |
| GP11   | -0.018         | -           | -0.016         | -0.013      |
| GP14   | -              | -0.013      | 0.006          | -           |
| GP15   | -              | -           | -0.008         | -           |
| GP16   | -0.017         | -           | -0.017         | -0.015      |
| GP17   | -0.015         | -           | -0.014         | -0.012      |
| GP18   | -              | -0.01       | -              | -0.006      |
| GP19   | -              | -0.018      | -0.009         | -0.026      |
| GP20   | 0.031          | 0.021       | 0.021          | 0.027       |
| GP21   | -              | -           | 0.012          | -           |
| GP22   | -              | -           | -              | -           |
| GP23   | -0.013         | -0.008      | -0.014         | -0.013      |
| GP26   | -              | -0.011      | -              | -0.01       |
| GP27   | -              | -           | 0.009          | 0.007       |
| GP28   | -0.007         | -0.012      | -0.011         | -0.013      |
| GP29   | 0.021          | 0.022       | 0.017          | 0.016       |
| GP30   | -              | -           | -              | -0.004      |
| GP31   | -              | -           | -              | -0.004      |
| GP32   | -              | -           | 0.004          | 0.009       |
| GP33   | -              | -           | 0.007          | 0.009       |
| GP34   | -              | -           | -              | 0.006       |
| GP35   | -              | -           | 0.006          | 0.006       |
| GP36   | 0.012          | 0.022       | 0.013          | 0.019       |
| GP37   | 0.012          | 0.022       | 0.01           | 0.015       |
| GP38   | 0.02           | 0.036       | 0.018          | 0.026       |
| GP39   | 0.015          | 0.02        | 0.02           | 0.023       |

# Supplementary Figure S1

## Multiple box plots analyzing morphine consumption according to baseline glycoprotein

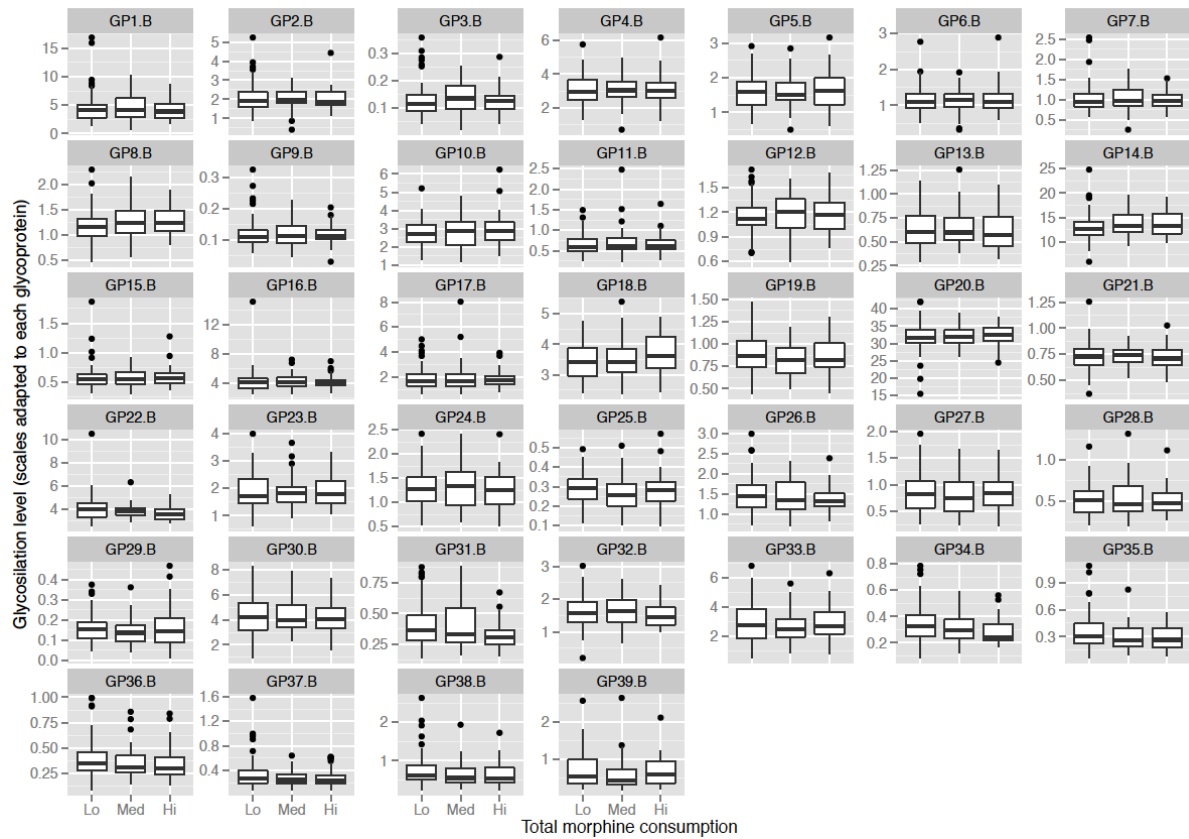

# Supplementary Figure S2

## Multiple box plots analyzing morphine consumption according to 6-hour glycoprotein levels

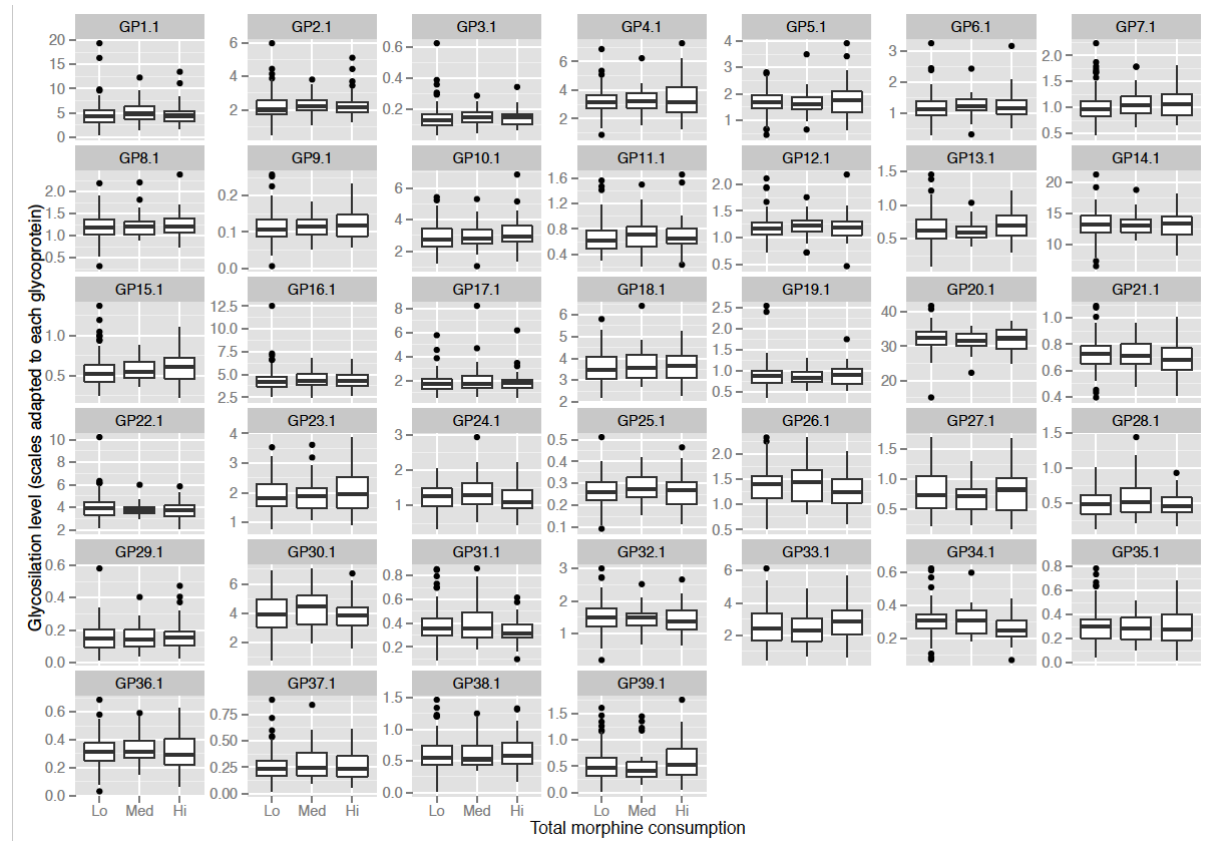

Supplement: srep31234-s1.pdf [file srep31234-s1.pdf]
